# Supplementary material
Source: MDPI journal article supplement (https://www.mdpi.com/2073-4433/11/11/1262)

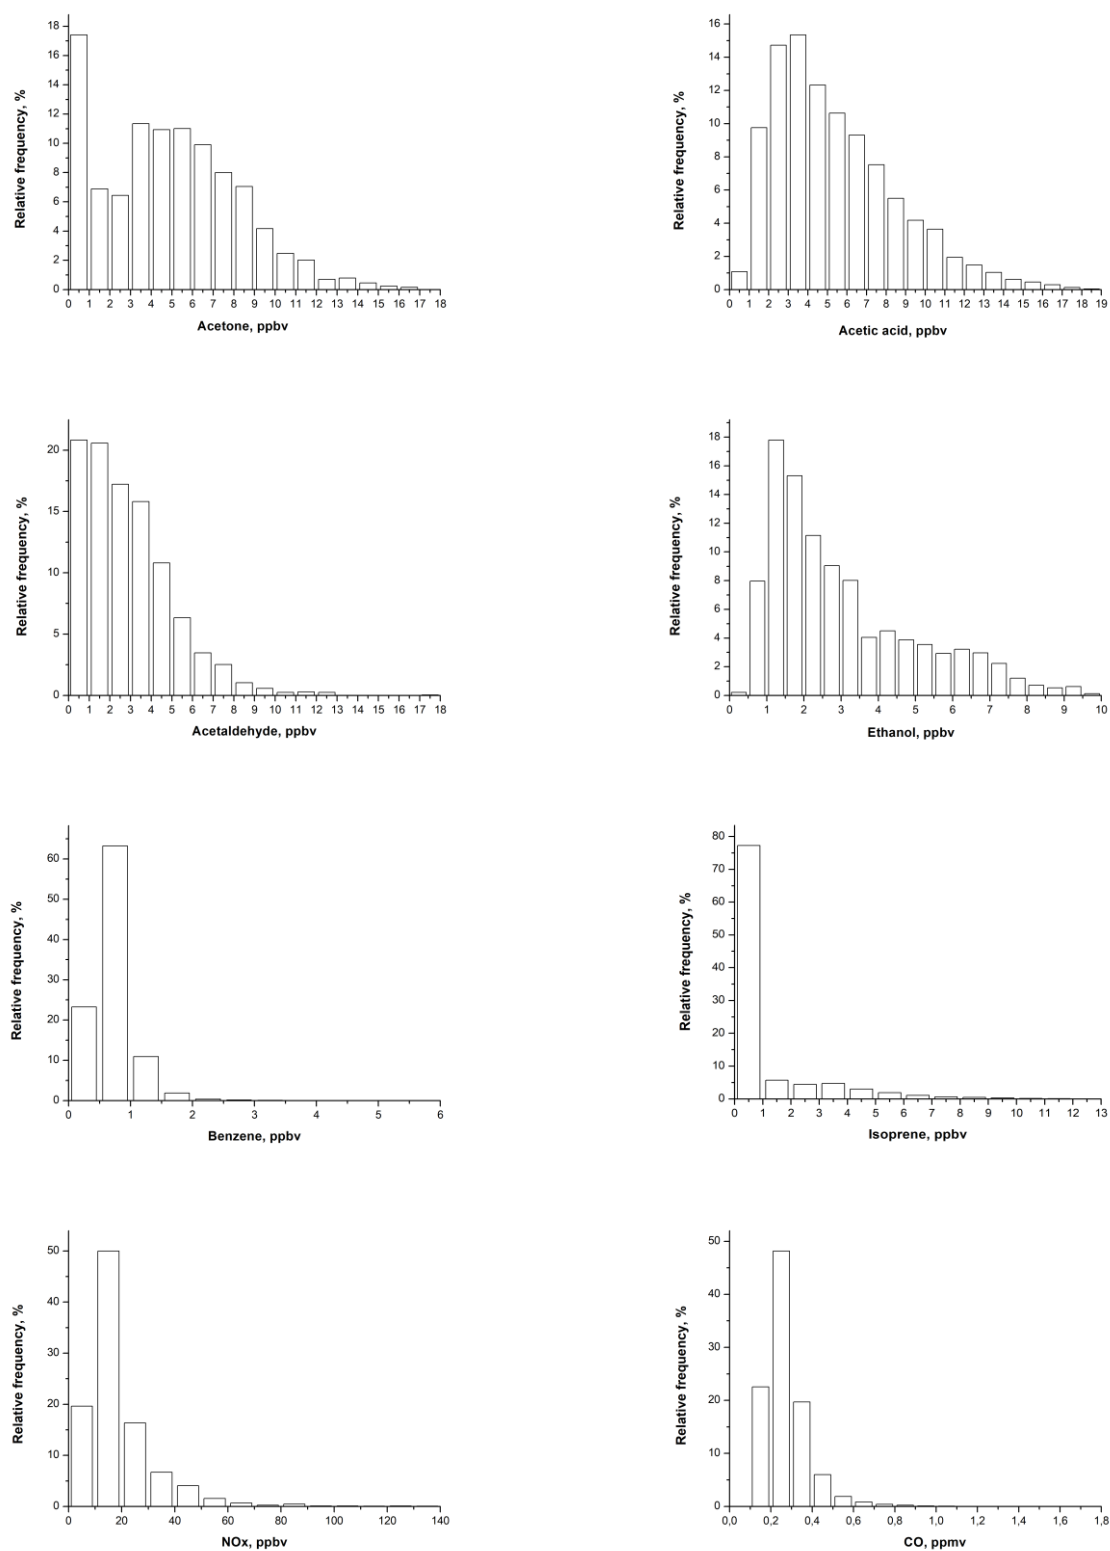

**Figure S1.** Frequency distribution of some atmospheric compounds in Moscow (summer of 2011–2013).

Supplement: s1 [file s1]
